# Supplementary material for: Identification of Multiple QTLs Linked to Neuropathology in the Engrailed-1 Heterozygous Mouse Model of Parkinson’s Disease
Source: PubMed Central journal article supplement (PMC4994027; doi:10.1038/srep31701), 2016-08-23
Supplement: srep31701-s1.pdf [file srep31701-s1.pdf]

# Identification of Multiple QTLs Linked to Neuropathology in the *Engrailed1* Heterozygous Mouse Model of Parkinson's Disease

---

Zuzanna Kurowska<sup>a,b,c,#</sup>, Michael Jewett<sup>a,#</sup>, Per Ludvik Brattås<sup>a,#</sup>, Itzia Jimenez-Ferrer<sup>a</sup>, Xuyian Kenéz<sup>a</sup>, Tomas Björklund<sup>d</sup>, Ulrika Nordström<sup>e</sup>, Patrik Brundin<sup>f</sup> and Maria Swanberg<sup>a,\*</sup>

- a. Neurodegeneration and Inflammation Genetics Unit, Wallenberg Neuroscience Center, Department of Experimental Medical Science, Lund University, BMC A10, Sölvegatan 17, 221 84 Lund, Sweden
- b. Department of Neurosciences, Lerner Research Institute, Cleveland Clinic, 9500 Euclid Avenue, Cleveland, Ohio 44195, USA
- c. Renovo Neural Inc., 10000 Cedar Avenue, Cleveland 44106, OH, USA
- d. Molecular Neuromodulation Unit, Lund University, Biomedical Center A10, Sölvegatan 17, 221 84 Lund, Sweden
- e. Department of pharmacology and clinical neuroscience, Byggnad 6M NUS, Umeå University, 901 87 Umeå, Sweden
- f. Laboratory of Translational Parkinson's Disease Research, Center for Neurodegenerative Science, Van Andel Research Institute, 333 Bostwick Ave, N.E., Grand Rapids, MI 49503, USA

## Supplementary Information

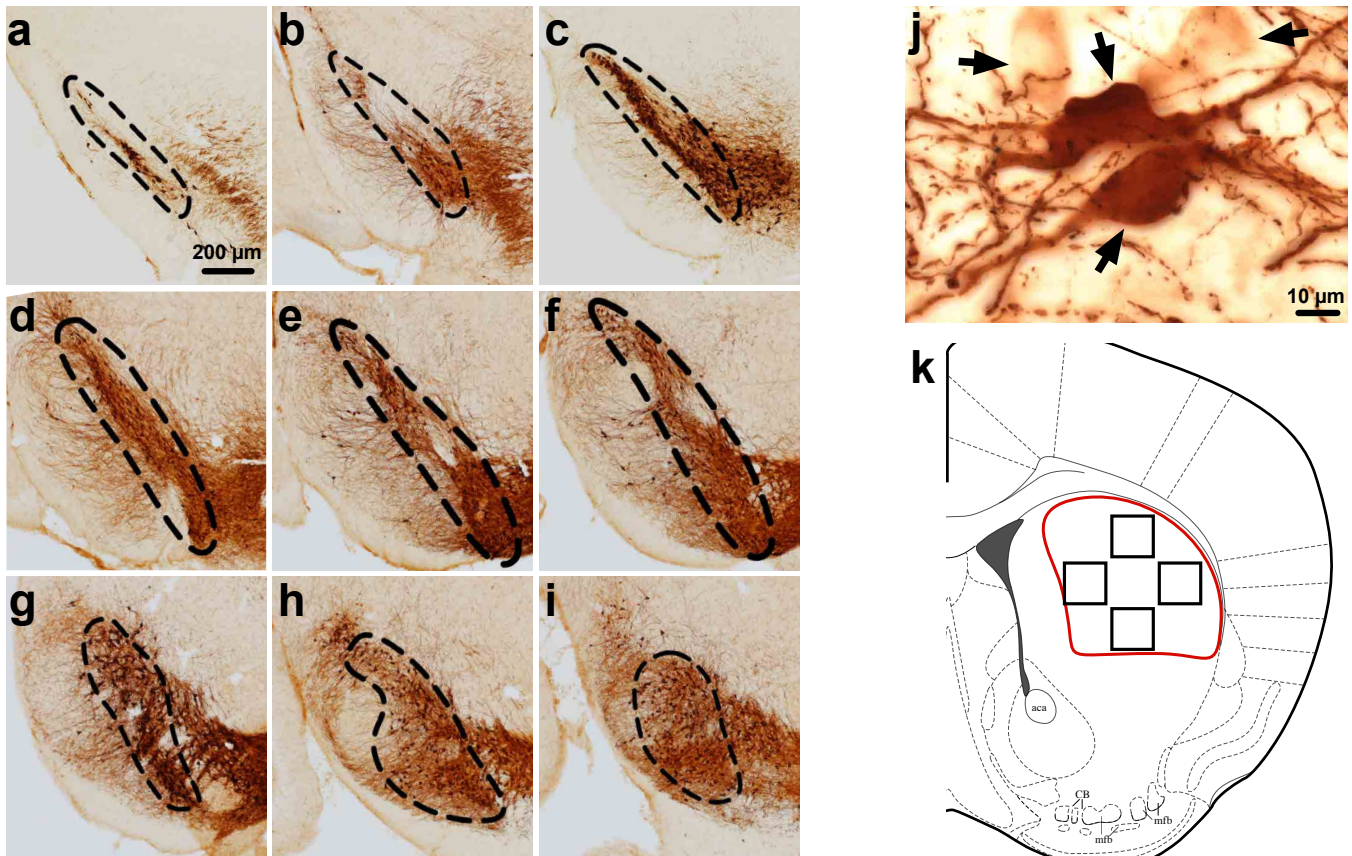

**Supplementary Figure S1. Representative sampling areas for the analyses of TH-stained DNs and axonal swellings.** A-I. Representation of every 3rd coronal section, spanning the SNpc region (-3.78 to -2.7 mm from bregma), organized rostro-caudally. SNpc region used for stereological estimation of total number of TH-positive DNs is marked in red. J. Examples of nigral TH-positive neurons included (black arrows) in the counting. K. Representation of the sampling scheme for the quantification of the axonal swellings in the dorso-lateral caudate putamen of striatum. Red line shows the dorso-lateral part where the 4 images (black rectangles) were taken.

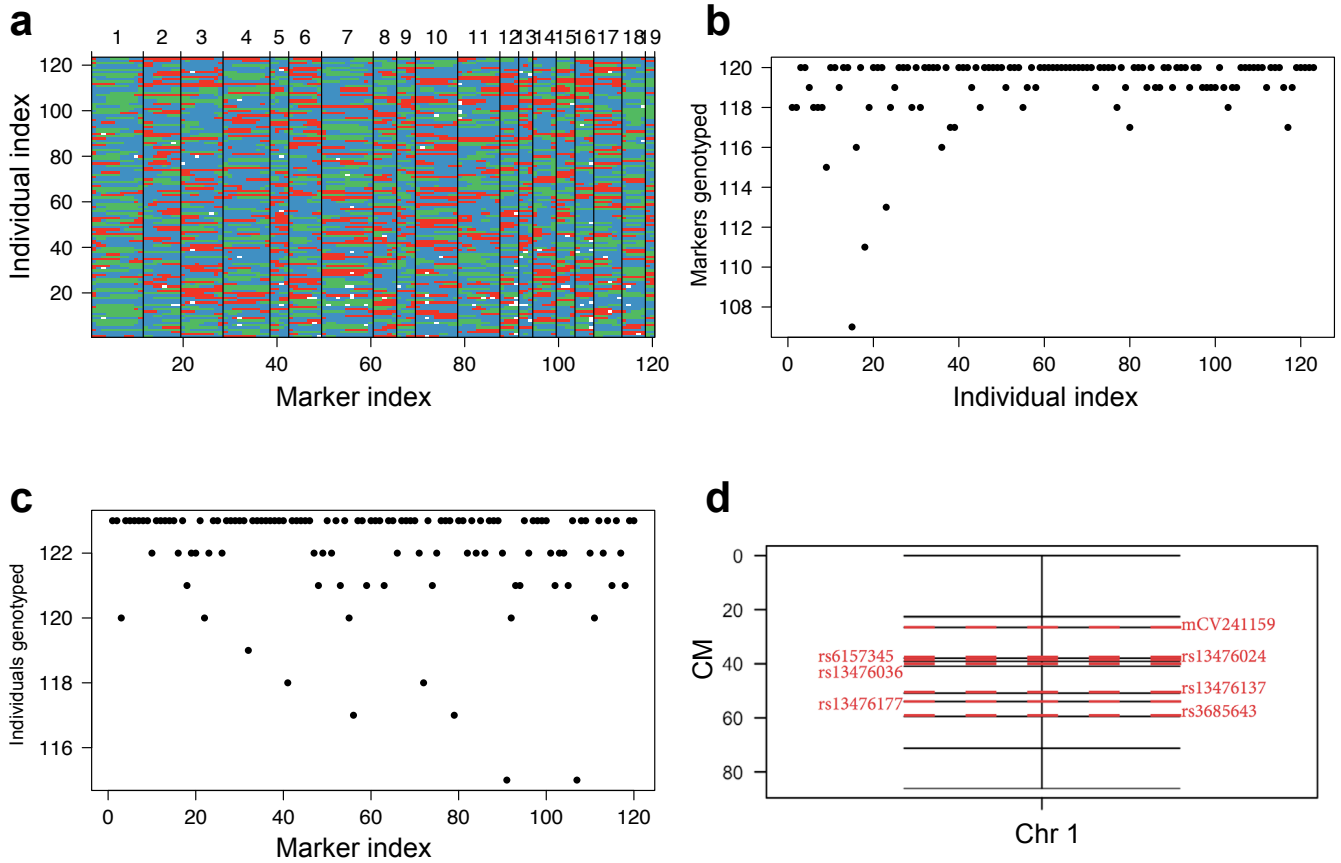

**Supplementary Figure S2. Genomic coverage.** A. Genotype data for each individual and each marker in the SNP genotyping. Red: Bl/Bl; Blue: Bl6/Sw; Green: Sw/Sw; B. Number of markers genotype for each genotyped individual; C. Number of individuals genotyped at each marker; D. Genetic map of chromosome 1. Red markers were removed from the analysis due to significantly distorted segregation patterns.

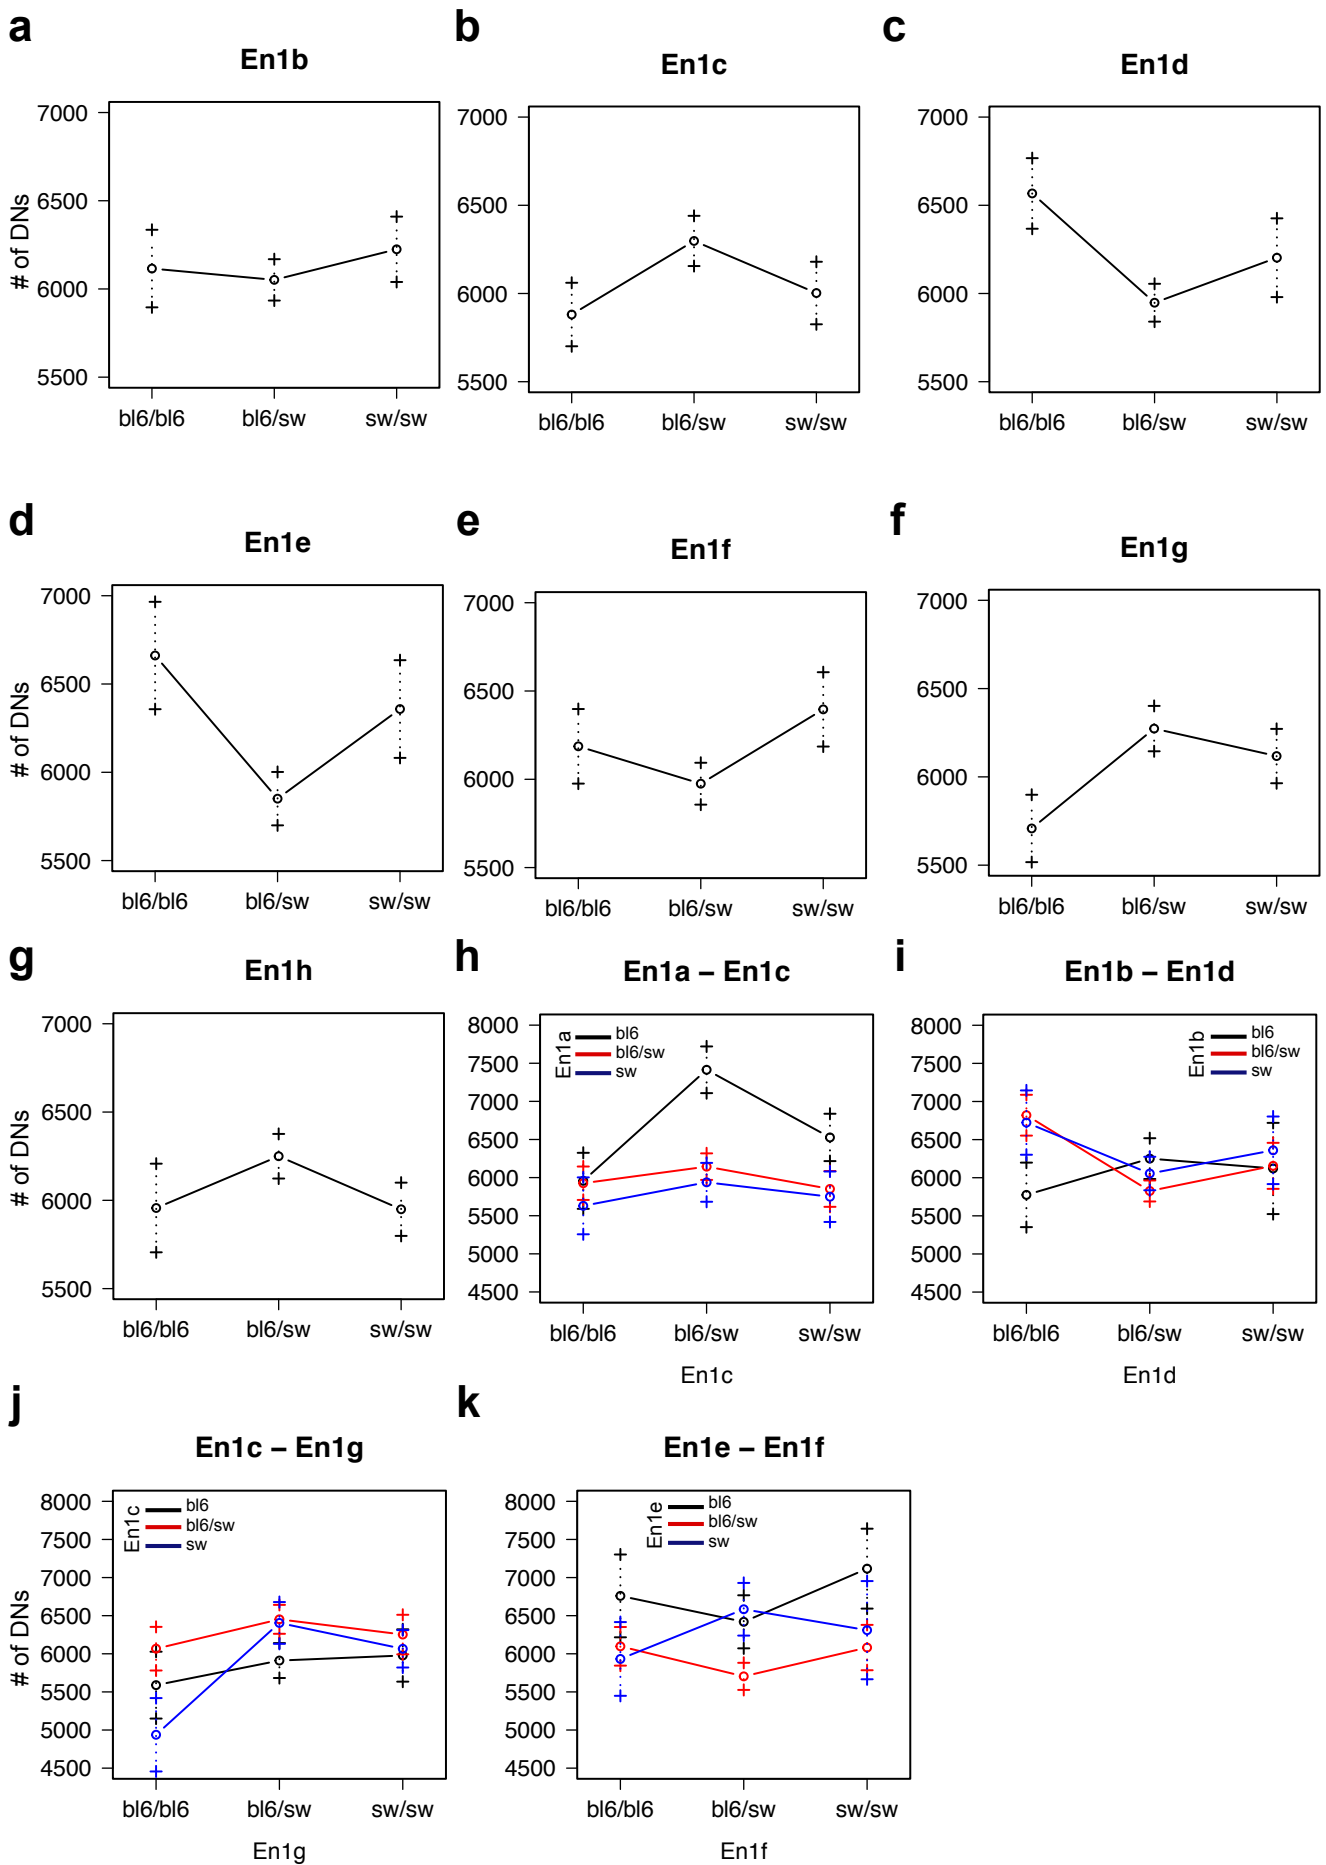

**Supplementary Figure S3. QTLs linked to number of DNs.** A-G. Effectplots for En1b – En1h; H-K. Interaction plots for the significant interactions for DN counts.

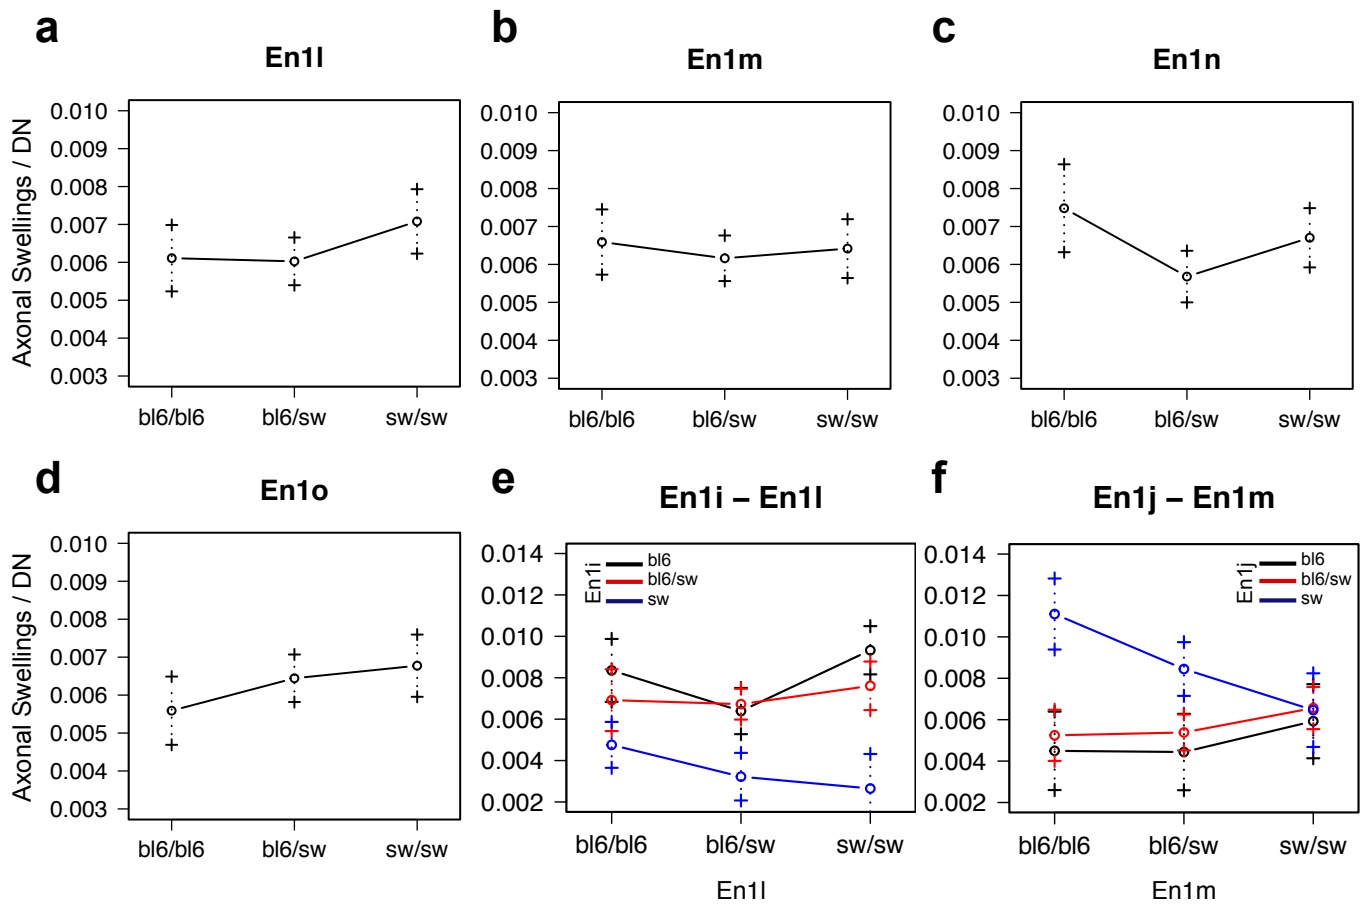

**Supplementary Figure S4. QTLs linked number of axonal swellings per number of remaining DNs.** A-D. Effectplots for En1l, m, n and o. E-F. Interaction plots for significant interactions between En1i-En1l and En1j-En1m.

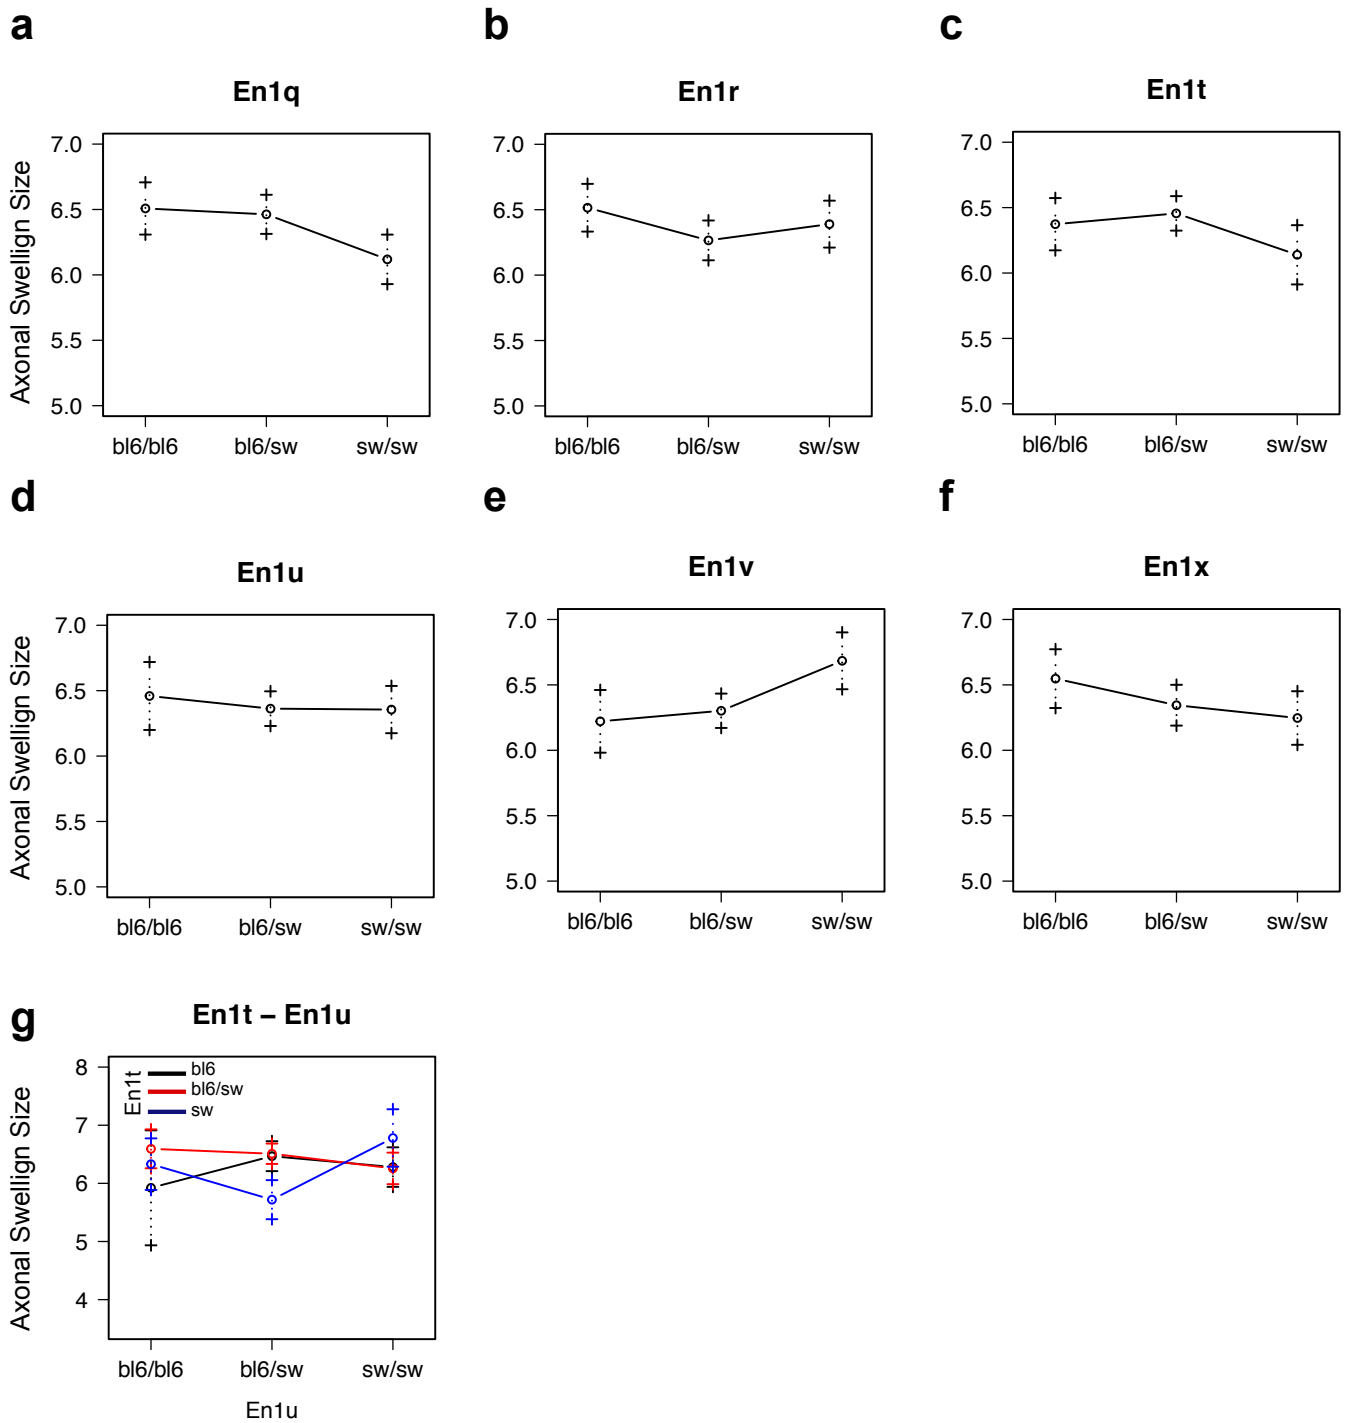

**Supplementary Figure S5. QTLs linked to size of axonal swellings.** A-F. Effectplots for En1q, r, t, u, v and x; G. Interaction plot for En1t-En1u.
